# Supplementary material for: Prediction of Drug Synergism between Peptides and Antineoplastic Drugs Paclitaxel, 5-Fluorouracil, and Doxorubicin Using In Silico Approaches
Source: MDPI journal article supplement (doi:10.3390/ijms24010069), 2022-12-21
Supplement: s1 [file s1]

# Supplementary Materials

## Prediction of Drug Synergism between Peptides and Antineoplastic Drugs Paclitaxel, 5-Fluorouracil and Doxorubicin using In Silico Approaches

Nuno Vale <sup>1,2,3,\*</sup>, Mariana Pereira <sup>1,3,4</sup>, Joana Santos <sup>1,3</sup>, Catarina Moura <sup>1,3</sup>, Lara Marques <sup>1,3</sup> and Diana Duarte <sup>1,3</sup>

<sup>1</sup> OncoPharma Research Group, Center for Health Technology and Services Research (CINTESIS), Rua Doutor Plácido da Costa, 4200-450 Porto, Portugal

<sup>2</sup> Department of Community Medicine, Health Information and Decision (MEDCIDS), Faculty of Medicine, University of Porto, Alameda Professor Hernâni Monteiro, 4200-319 Porto, Portugal

<sup>3</sup> CINTESIS@RISE, Faculty of Medicine, University of Porto, Alameda Professor Hernâni Monteiro, 4200-319, Porto, Portugal

<sup>4</sup> Institute of Biomedical Sciences Abel Salazar (ICBAS), University of Porto, Rua Jorge Viterbo Ferreira, 228, 4050-313 Porto, Portugal

\* Correspondence: [nunovale@med.up.pt](mailto:nunovale@med.up.pt)

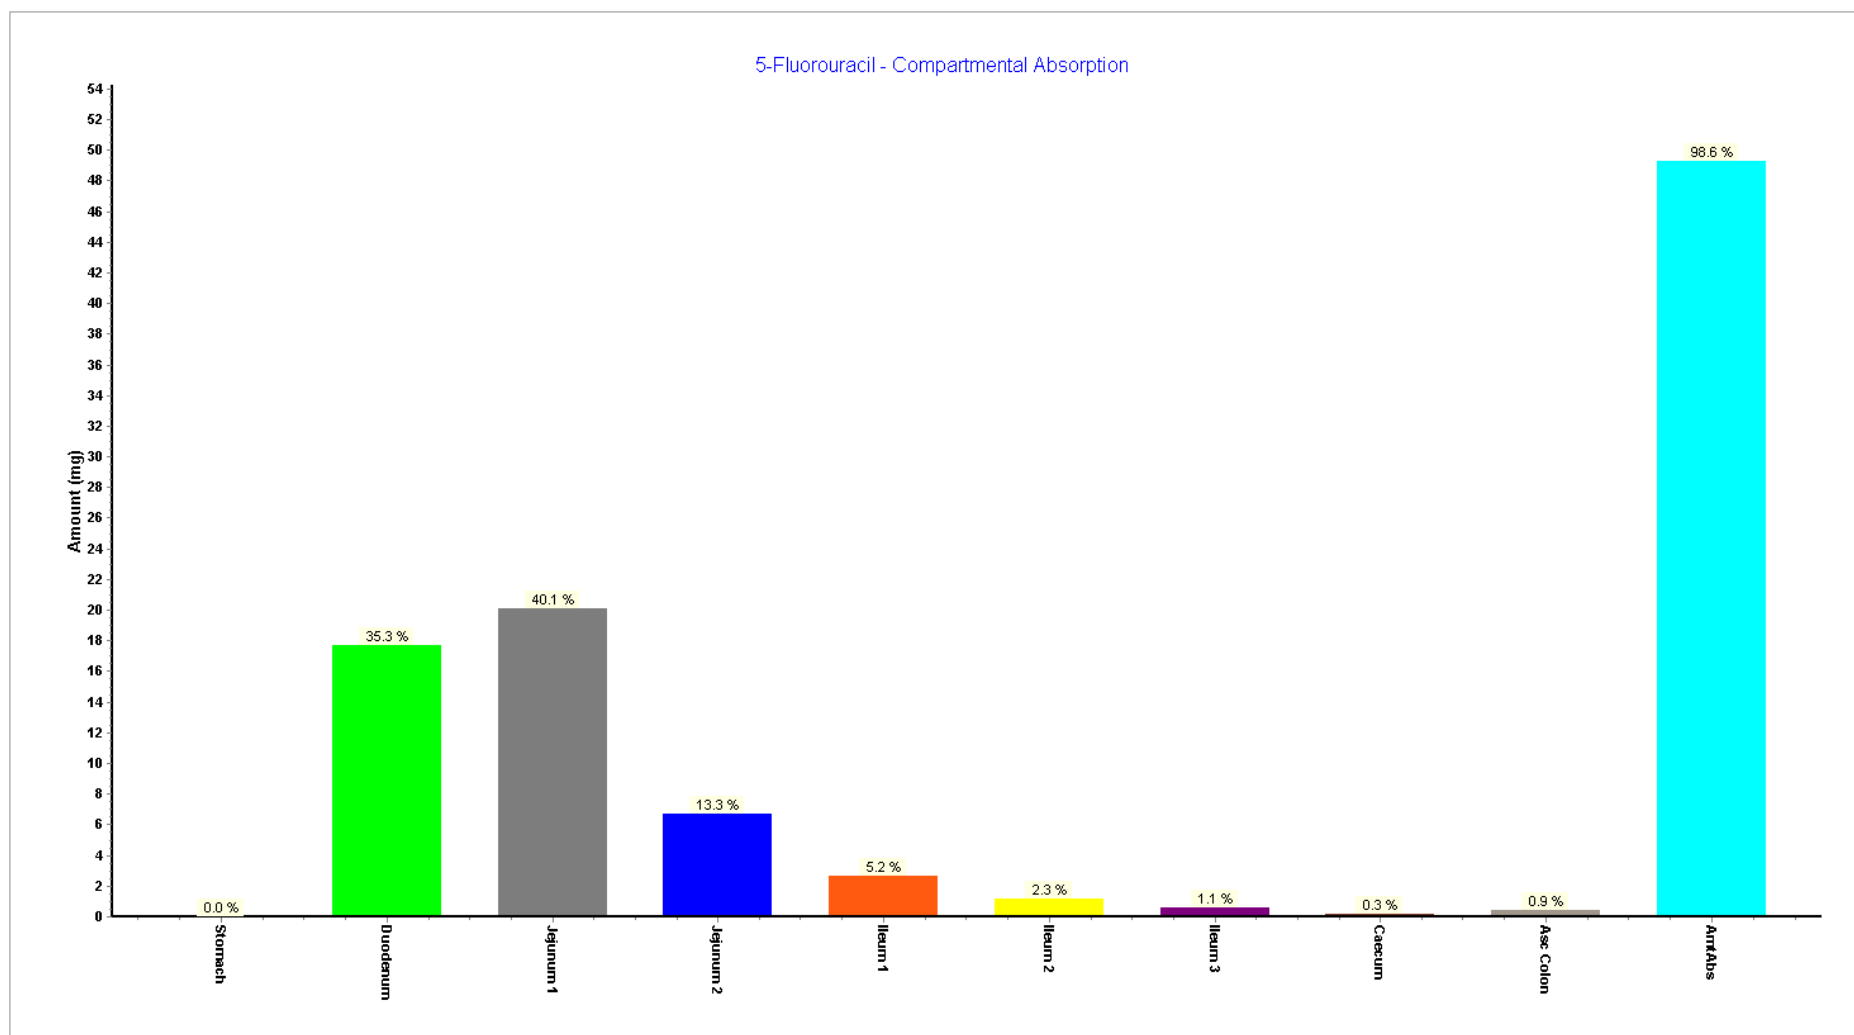

**Figure S1.** Compartmental absorption of 5-FU generated using the GastroPlus® software.

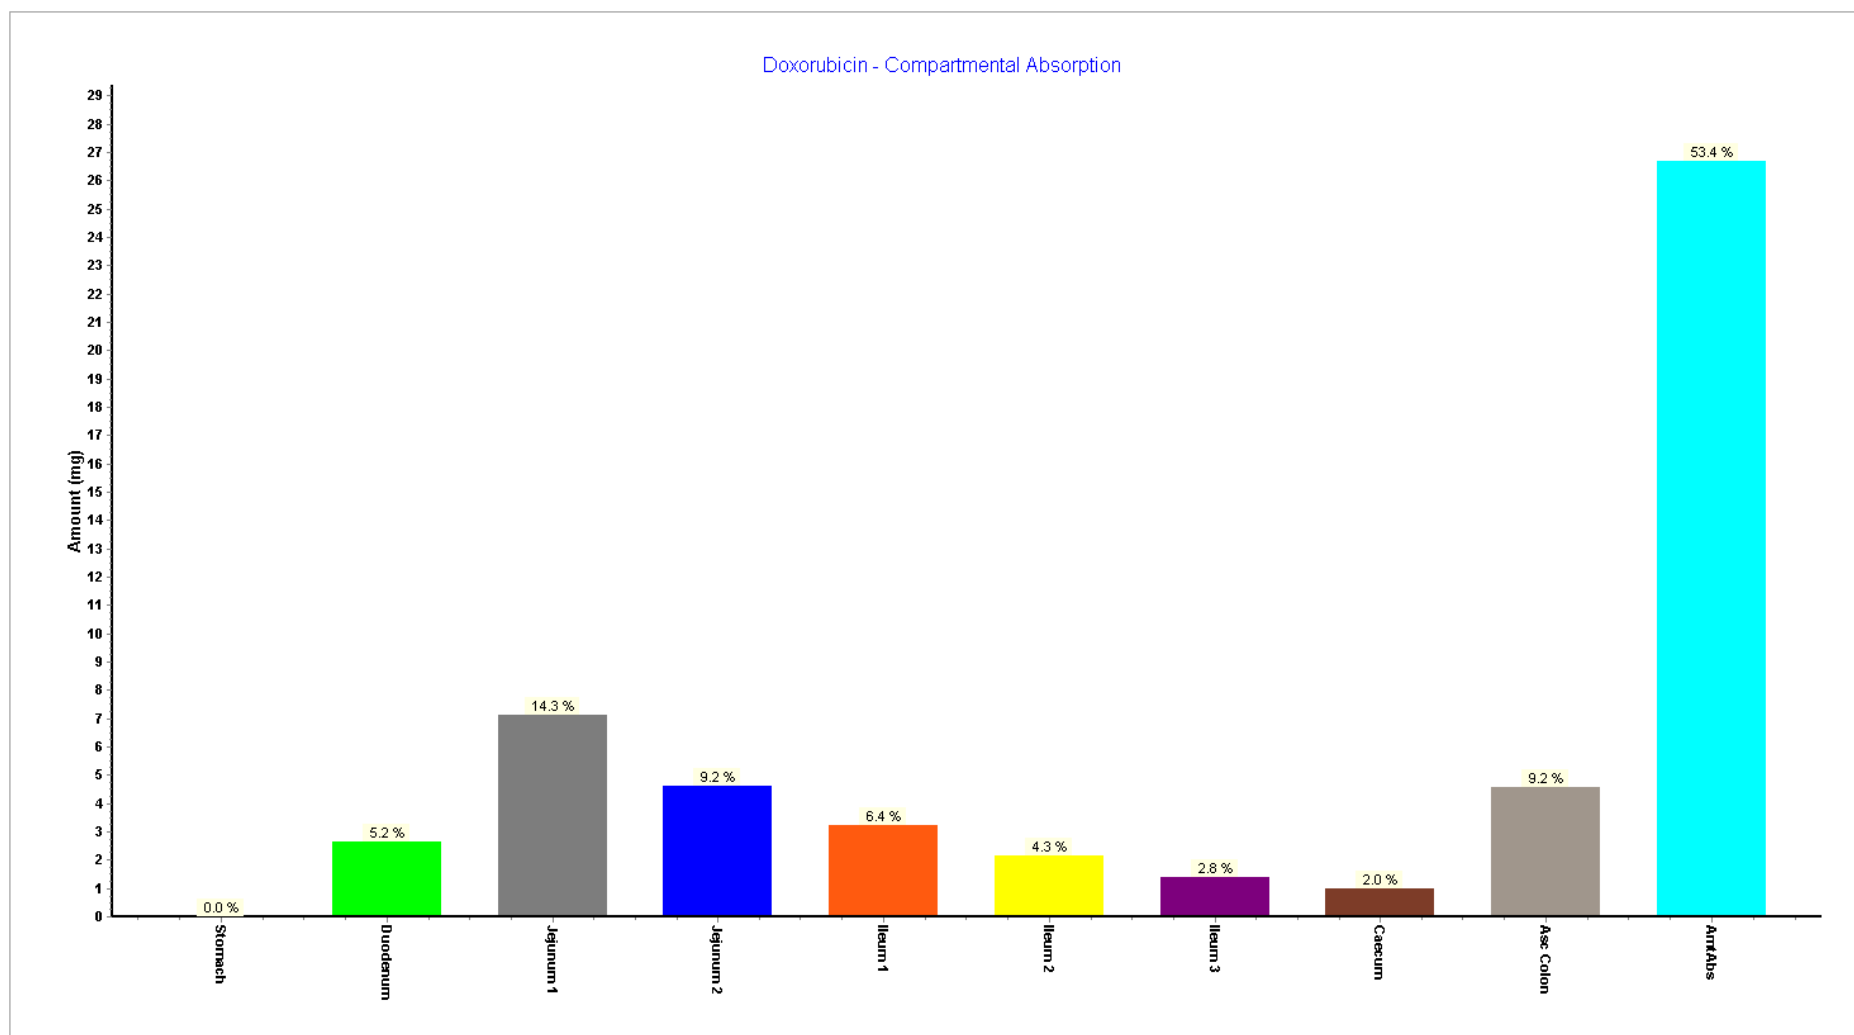

**Figure S2.** Compartmental absorption of DOXO generated using the GastroPlus® software.

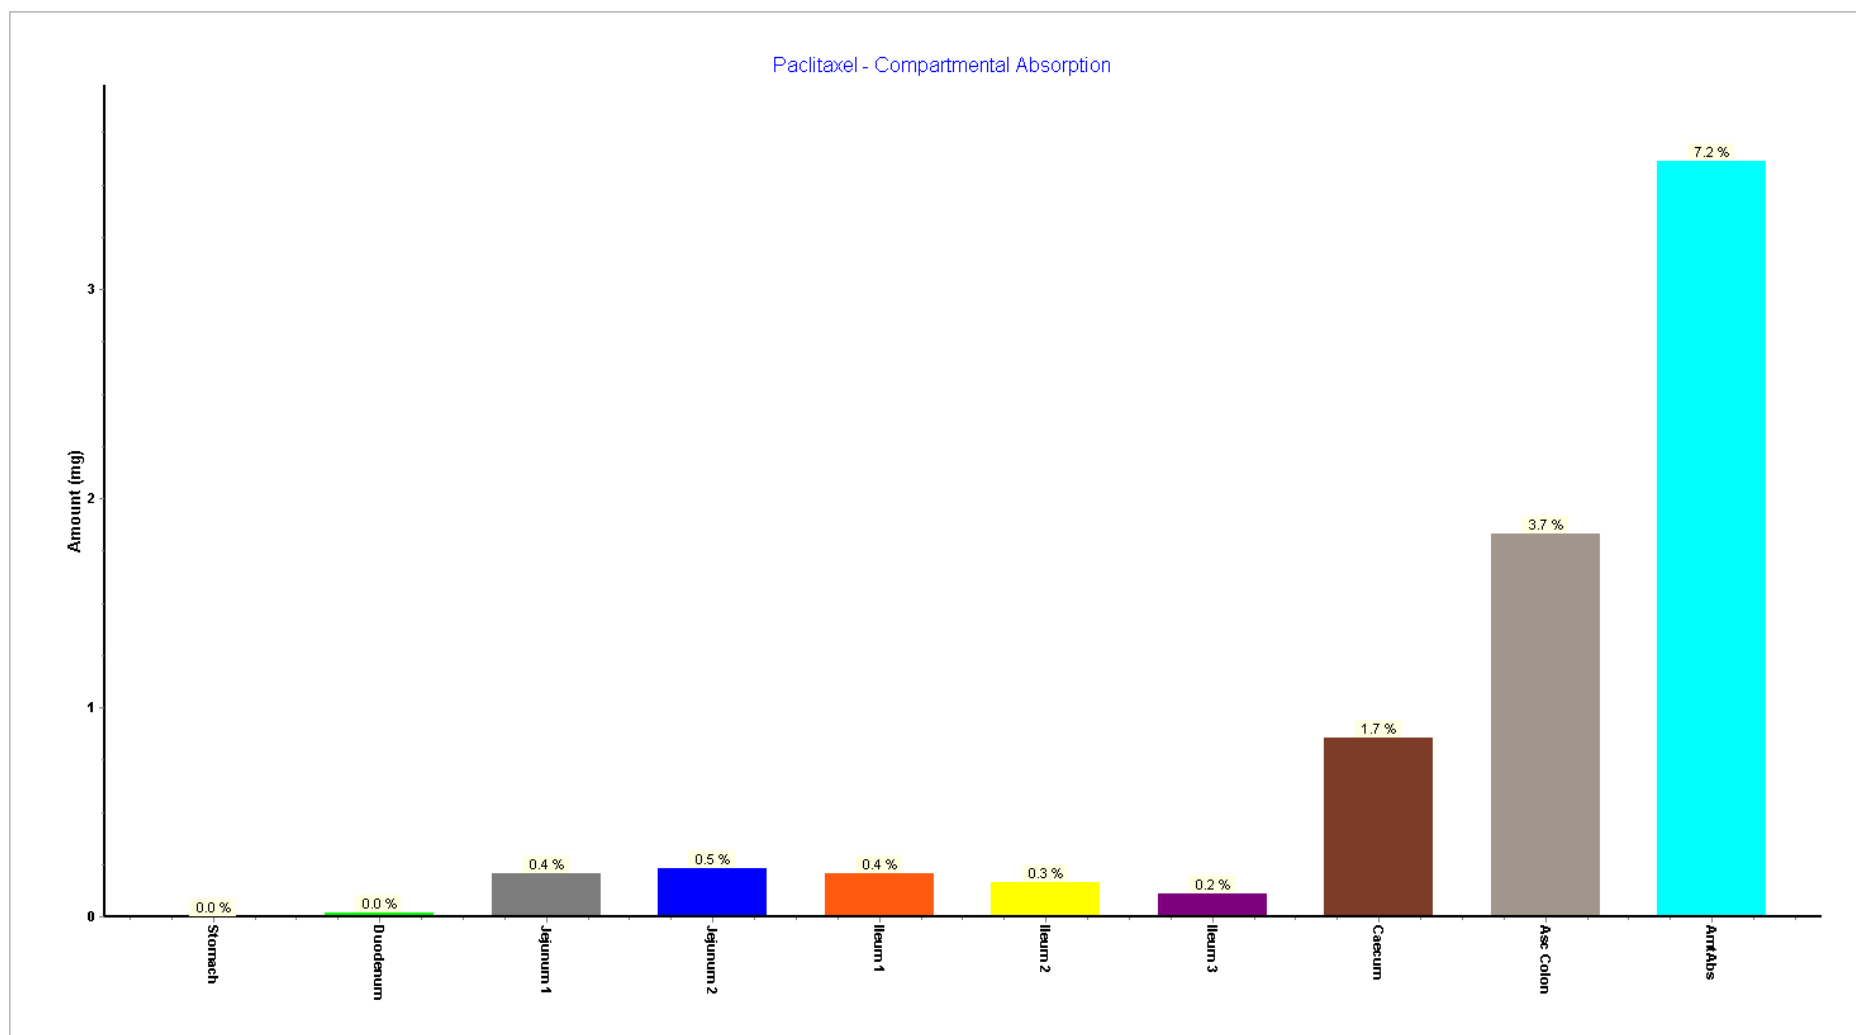

**Figure S3.** Compartmental absorption of PTX generated using the GastroPlus® software.

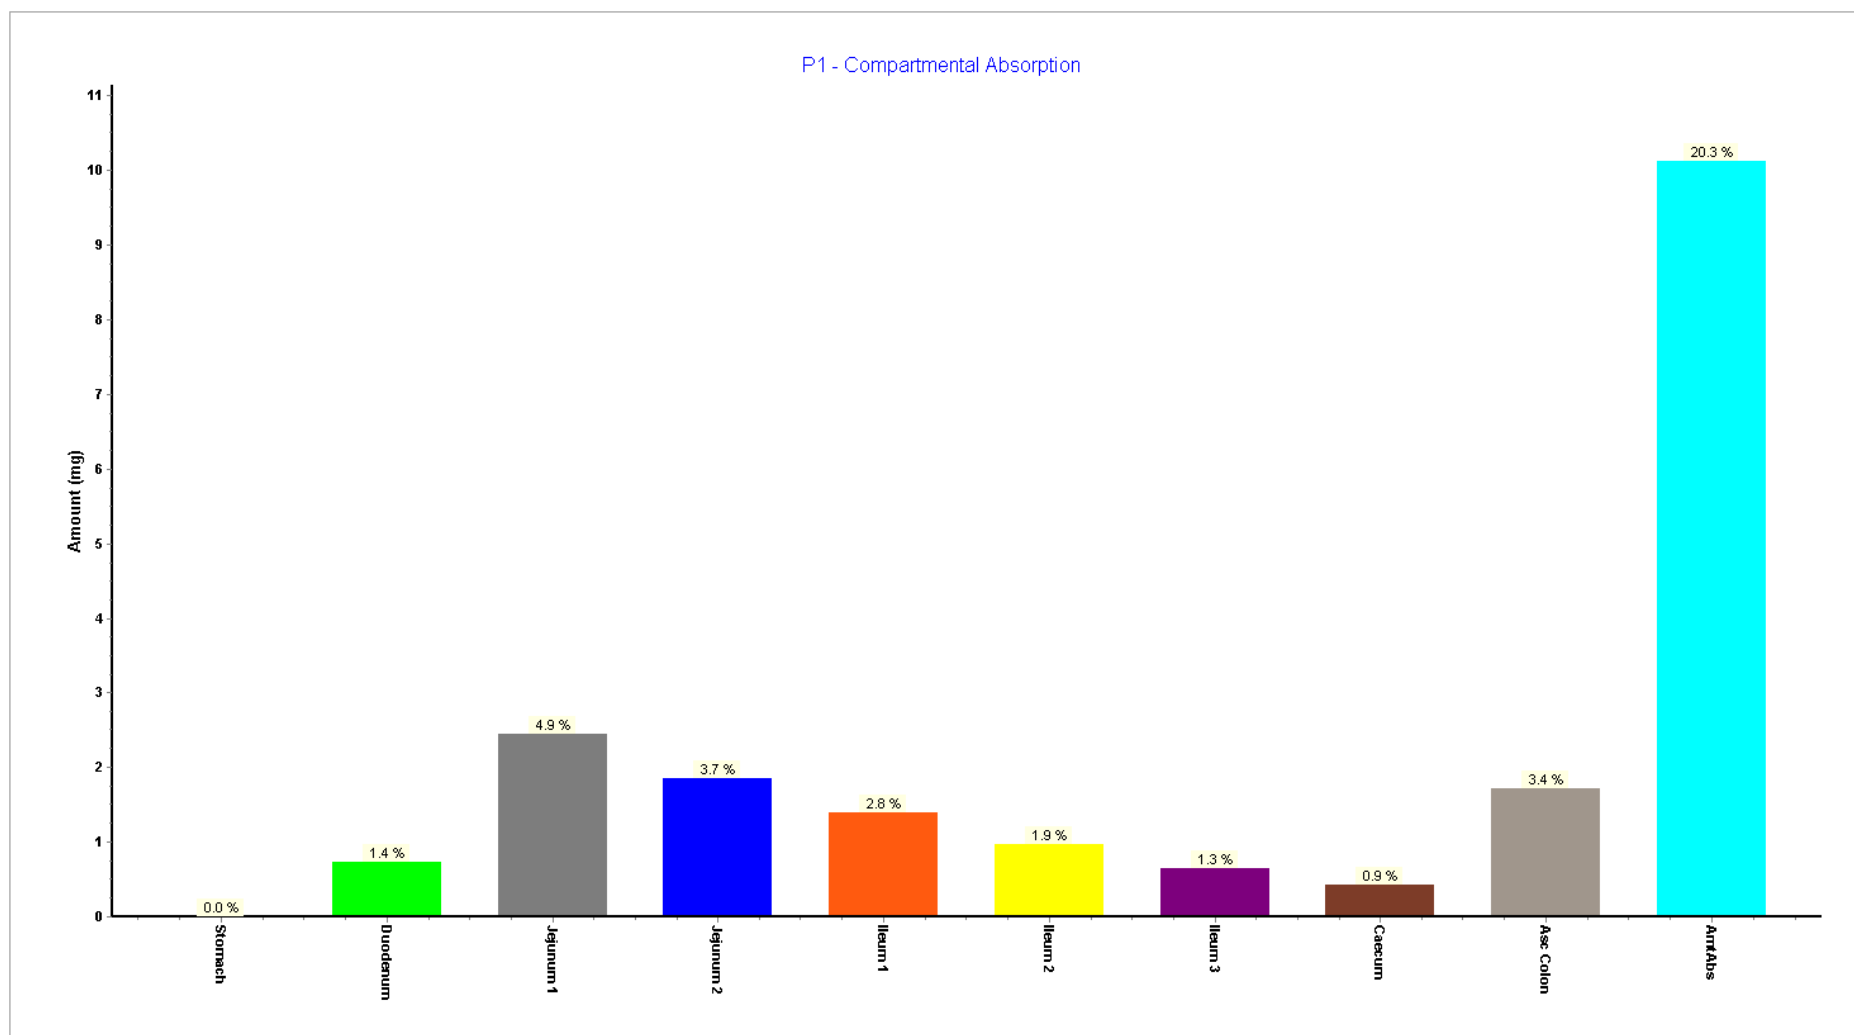

**Figure S4.** Compartmental absorption of P1 generated using the GastroPlus® software.

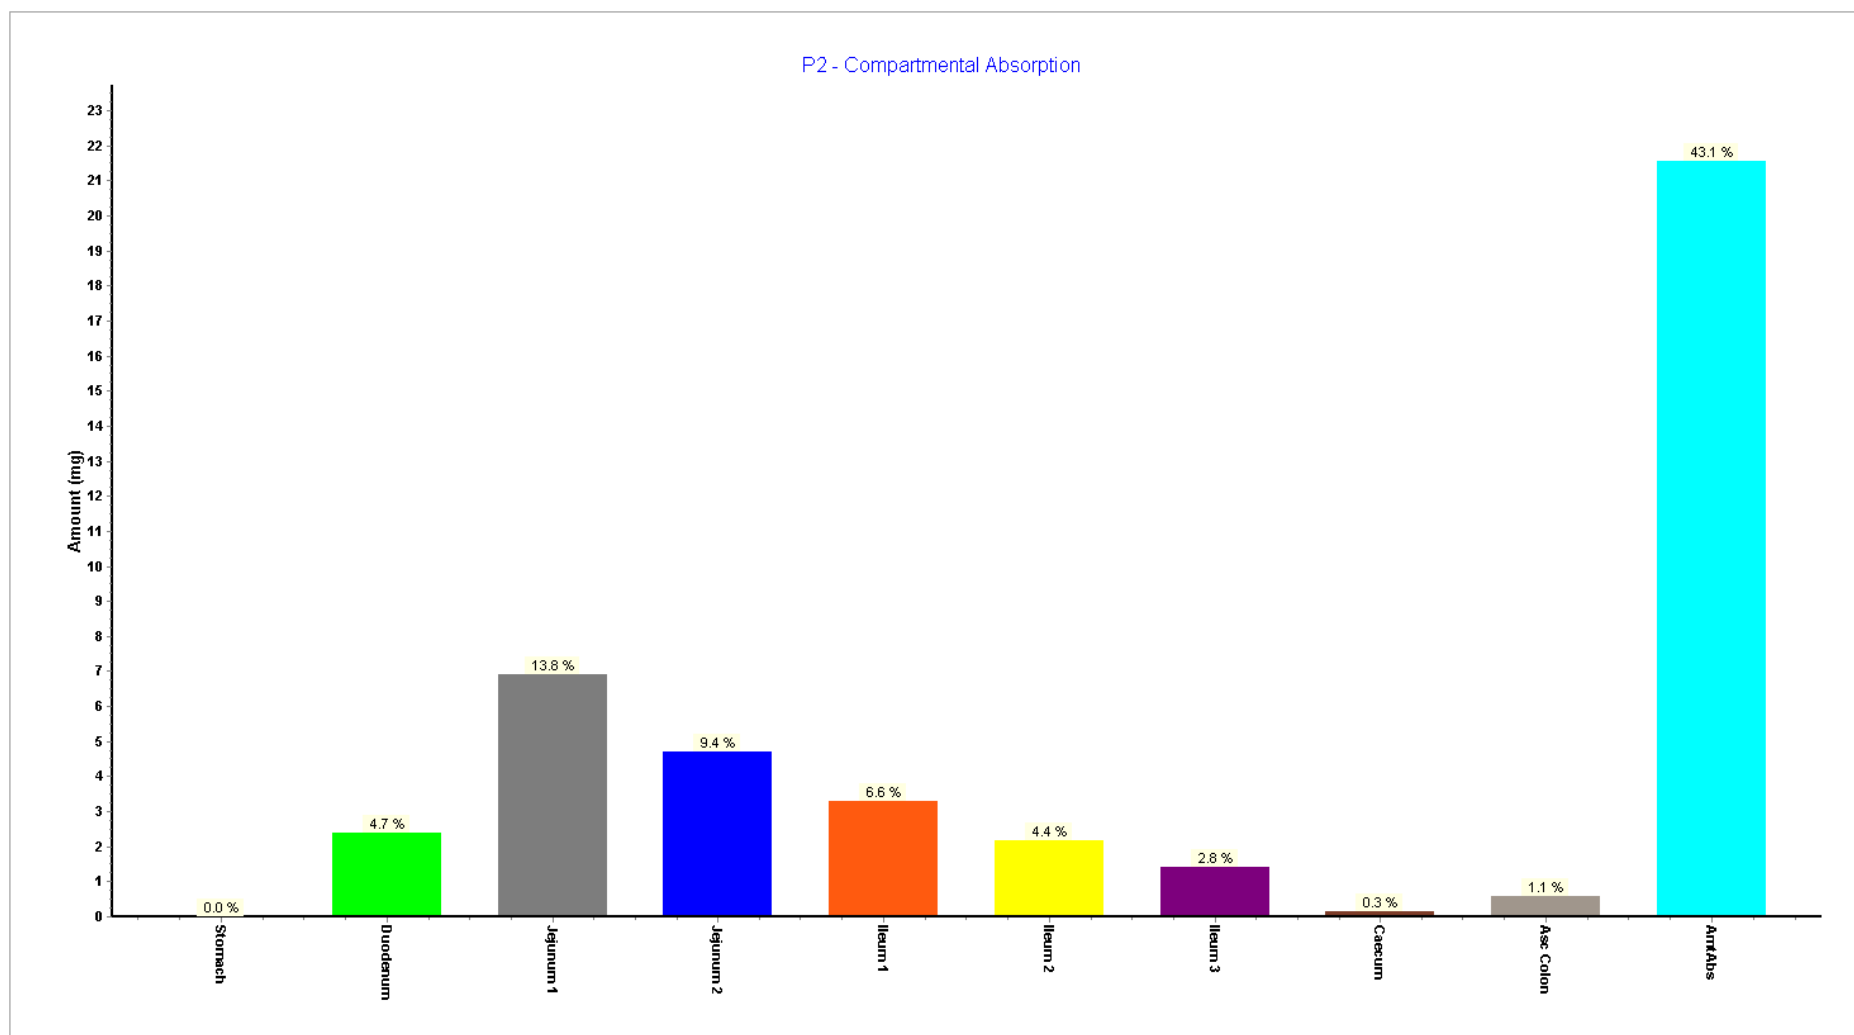

**Figure S5.** Compartmental absorption of P2 generated using the GastroPlus® software.

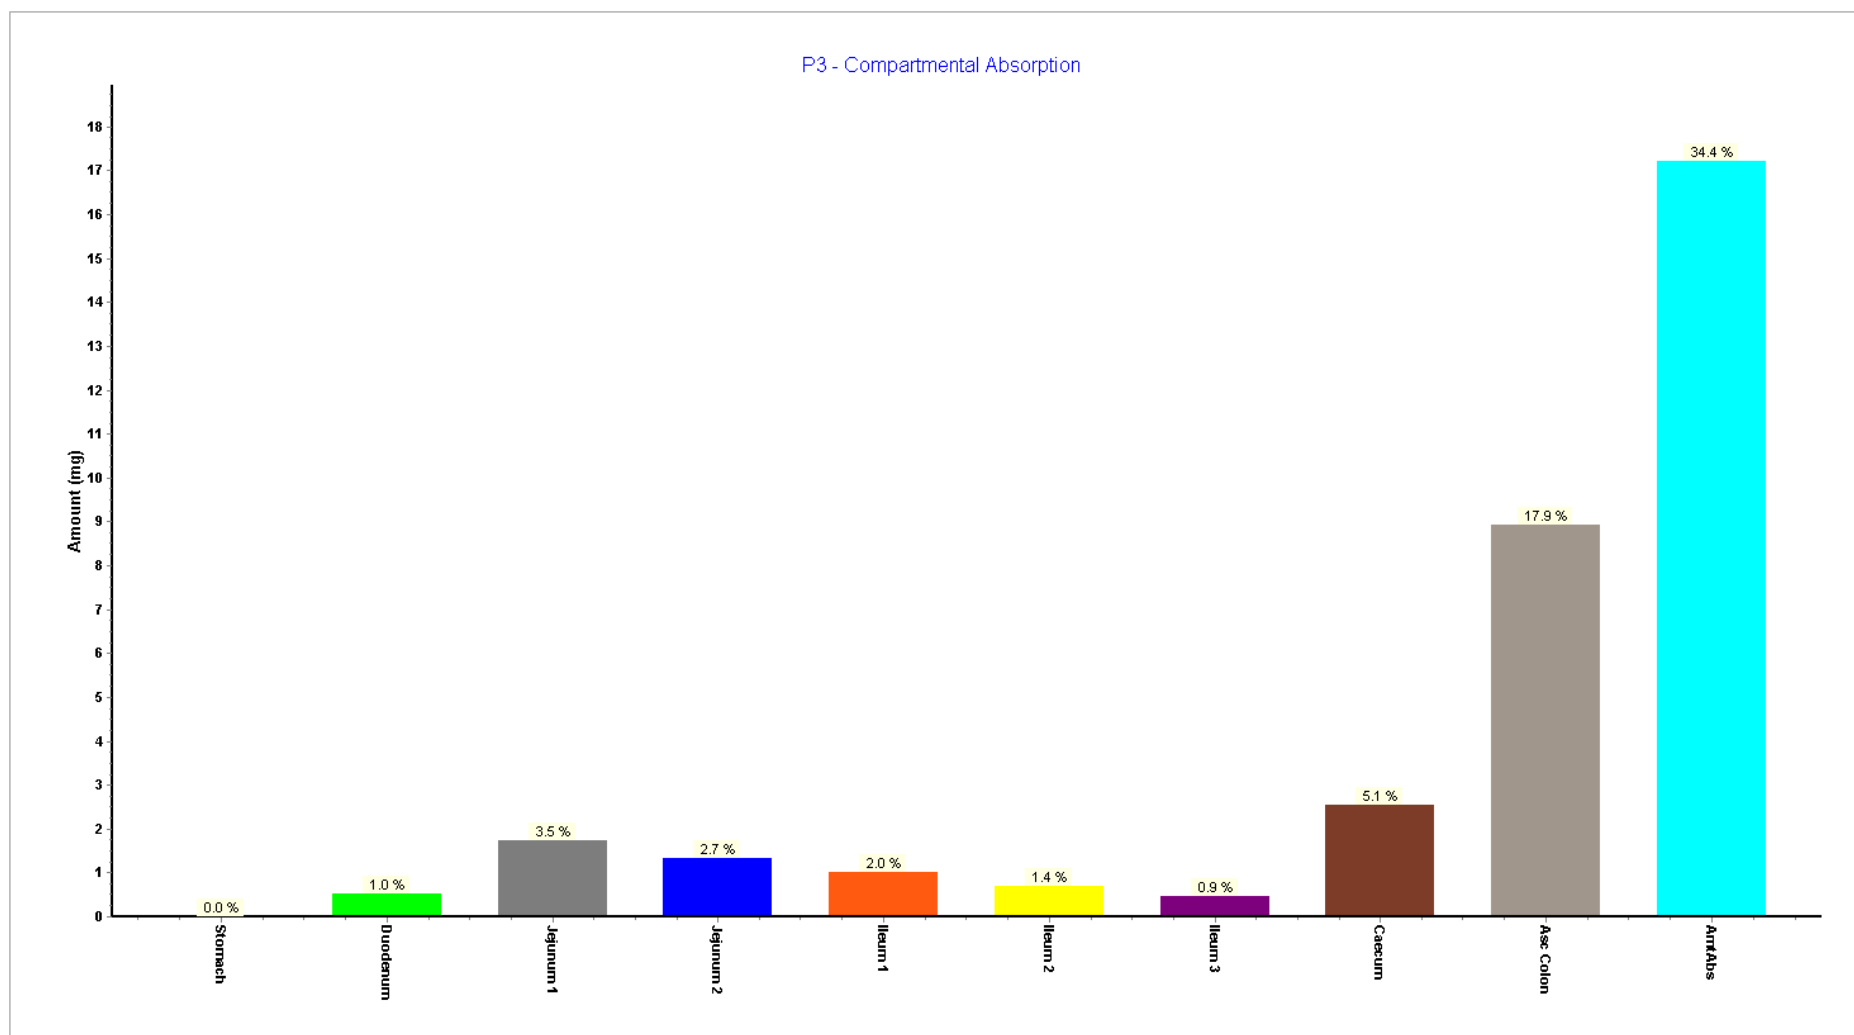

**Figure S6.** Compartmental absorption of P3 generated using the GastroPlus® software.

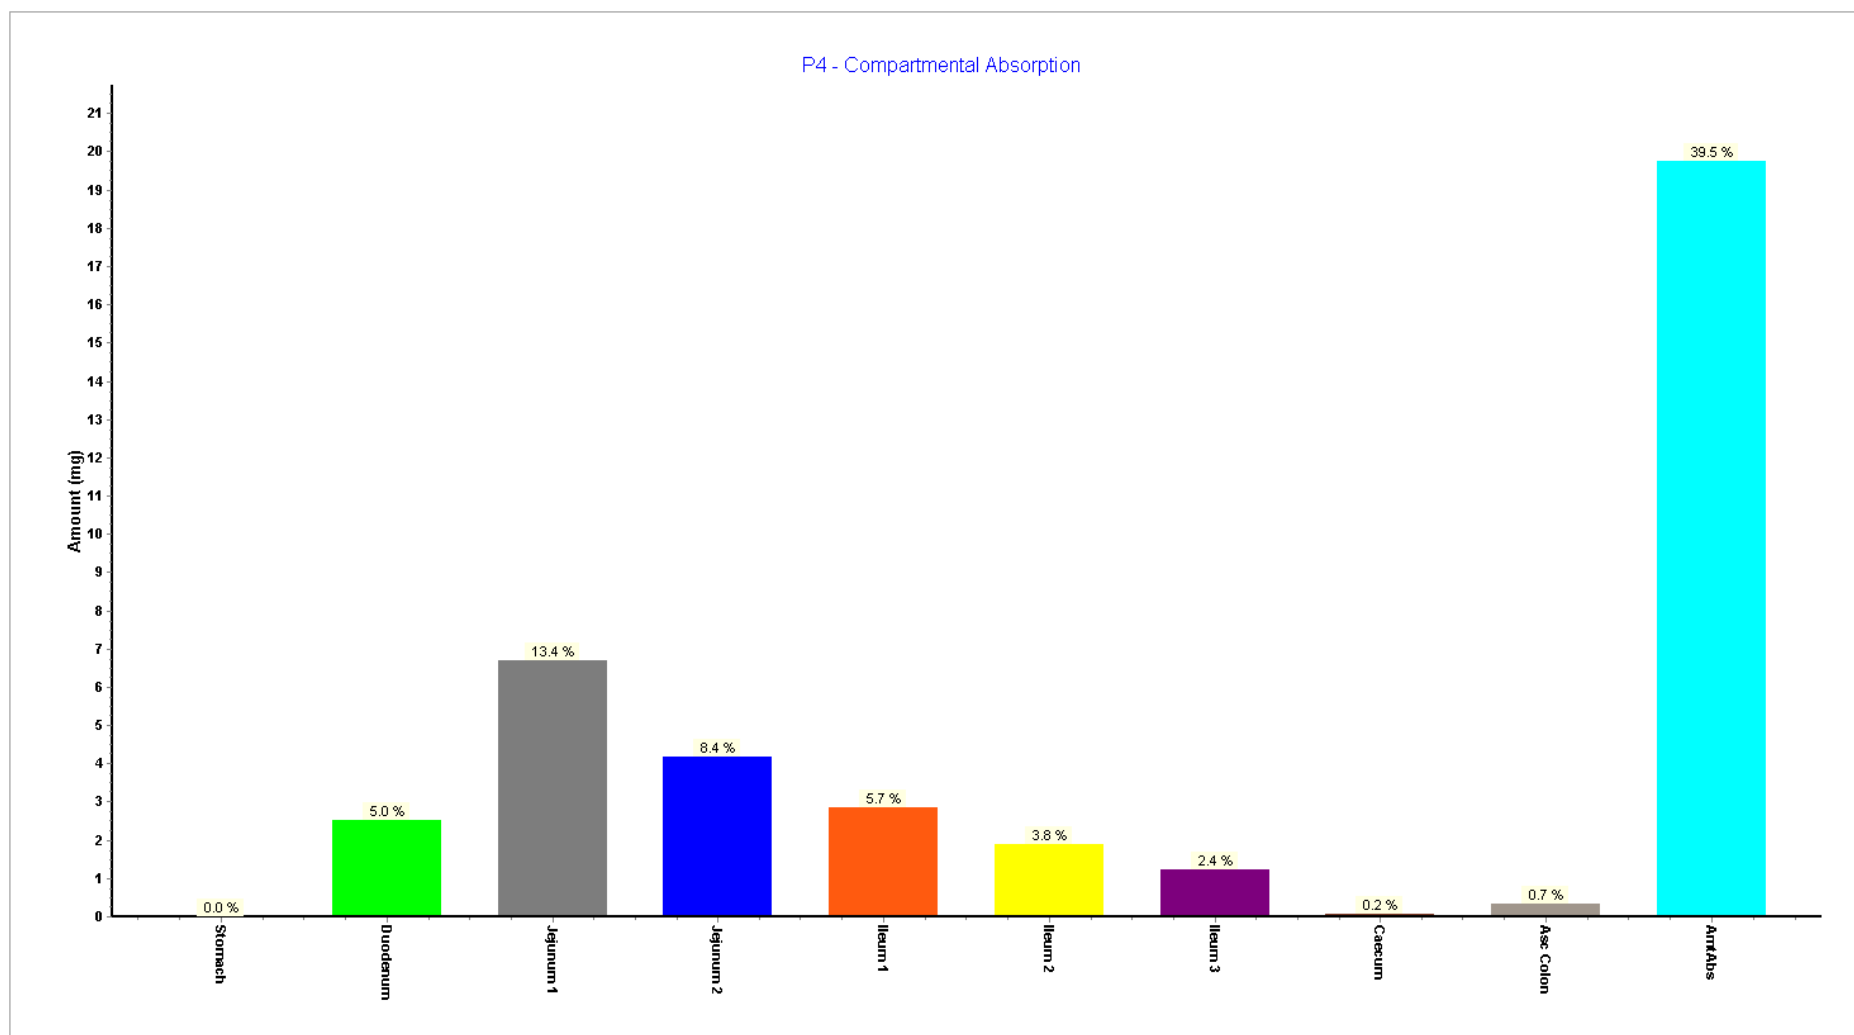

**Figure S7.** Compartmental absorption of P4 generated using the GastroPlus® software.
